# Supplementary material
Source: bioRxiv or medRxiv preprint supplement (https://medrxiv.org/highwire/filestream/78898/field_highwire_adjunct_files/6/2020.04.28.20083246-7.pdf)

**Figure S3. Kaplan-Meier curves comparing the overall survival among patients with different treatment status.**  
 Abbreviations: pts=patients, tx=treatment.

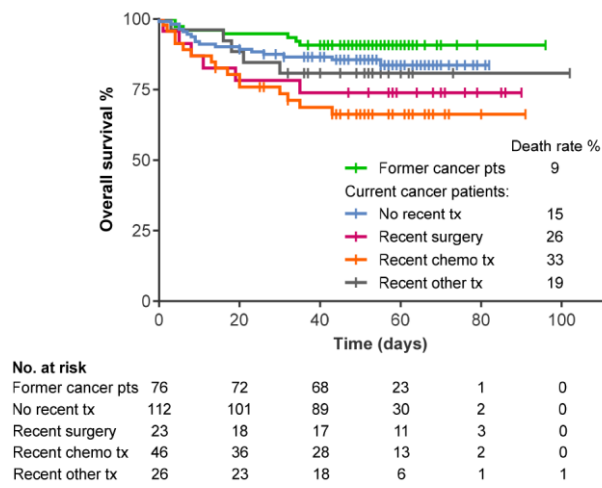

Supplement: Supplementary file [file 2020.04.28.20083246-7.pdf]
